# Supplementary material for: CO2/CH4 and H2/CH4 Gas Separation Performance of CTA-TNT@CNT Hybrid Mixed Matrix Membranes
Source: MDPI journal article supplement (doi:10.3390/membranes11110862), 2021-11-09
Supplement: s1 [file s1]

## Supplementary Information

### CO<sub>2</sub>/CH<sub>4</sub> and H<sub>2</sub>/CH<sub>4</sub> gas separation performance of CTA-TNT@CNT hybrid mixed matrix membranes

Chhabilal Regmi<sup>1,\*</sup>, Saeed Jamali Ashtiani<sup>1</sup>, Zdeněk Hrdlička<sup>2</sup>, Karel Friess<sup>1,\*</sup>

<sup>1</sup>Department of Physical Chemistry, University of Chemistry and Technology, Technická 5, 16628, Prague 6, Czech Republic

<sup>2</sup>Department of Polymers, University of Chemistry and Technology, Technická 5, 16628, Prague 6, Czech Republic

Correspondence: regmic@vscht.cz; friessk@vscht.cz

## Results

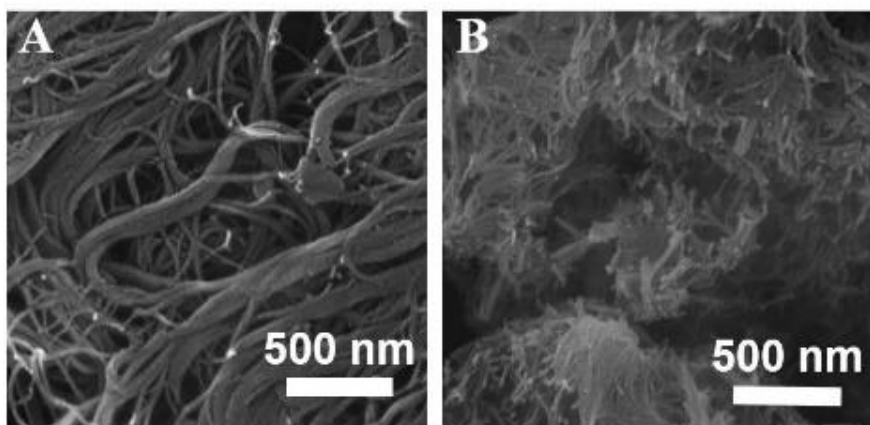

**Figure S1** SEM images of; A) CNT and B) TNT nanoparticles.

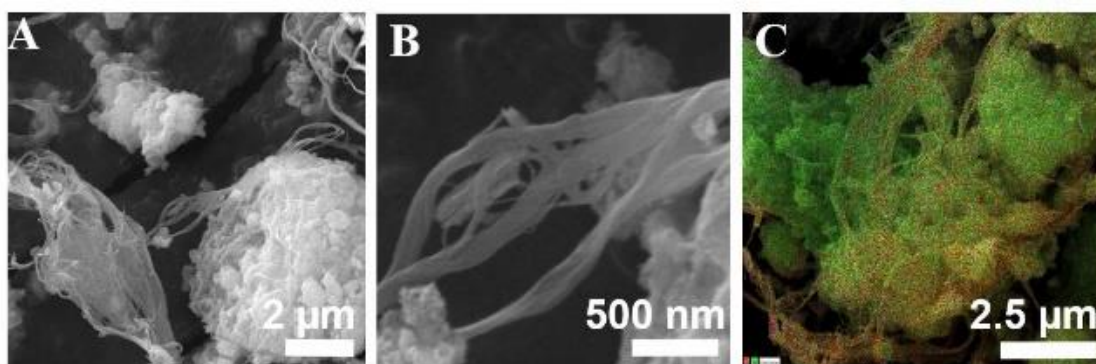

**Figure S2** SEM and EDS overlaid images of TNT@CNT hybrid fillers.

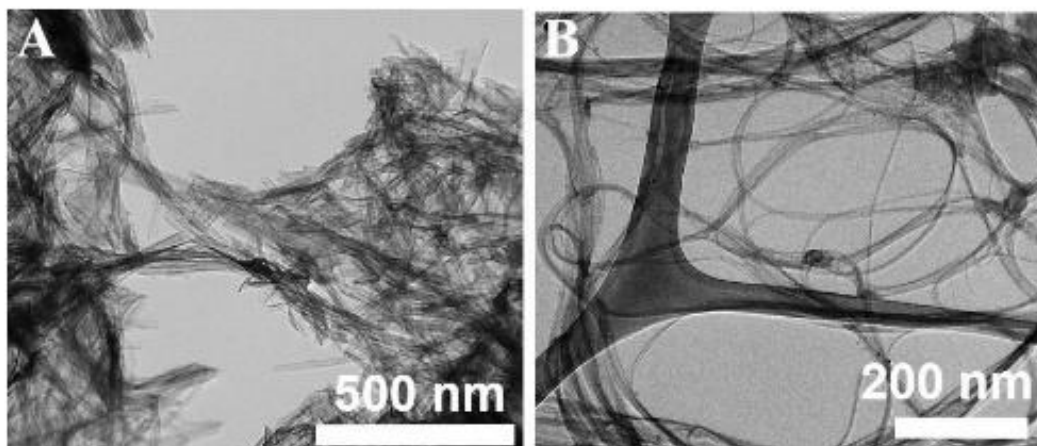

**Figure S3** TEM images of; A) TNT and B) CNT nanoparticles.

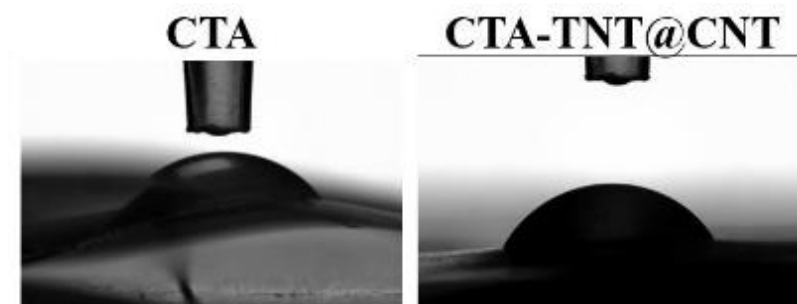

**Figure S4** Image of the nature of the drop onto the membrane during contact angle measurement of CTA and CTA-TNT@CNT MMMs

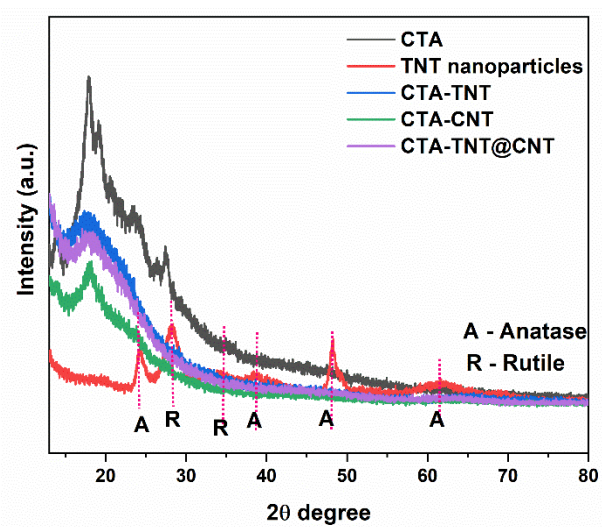

**Figure S5** XRD spectra of the synthesized MMMs with different fillers.

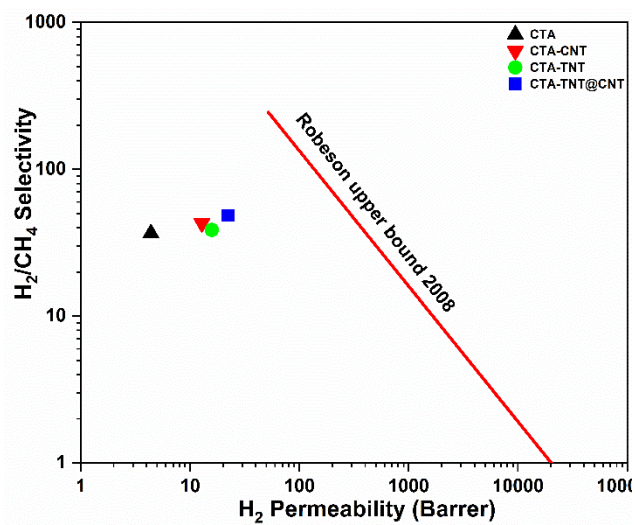

**Figure S6** Plot of  $H_2/CH_4$  separation efficiency of synthesized membranes compared with the Robeson upper-bound plot.
